# Supplementary material for: Open-source tool for real-time and automated analysis of droplet-based microfluidic
Source: Royal Society of Chemistry journal article supplement (doi:10.1039/d3lc00327b), 2023-01-01
Supplement: d3lc00327b1.pdf [file d3lc00327b1.pdf]

## Supplementary Material

### Open-source tool for real-time and automated analysis of droplet-based microfluidic

Joana P. Neto,\* Ana Mota, Gonçalo Lopes, Beatriz J. Coelho, João Frazão, André T. Moura, Beatriz Oliveira, Bárbara Sieira, José Fernandes, Elvira Fortunato, Rodrigo Martins, Rui Igreja, Pedro V. Baptista, Hugo Águas,\*

\* **Correspondence:** joana.neto@campus.fct.unl.pt and hma@fct.unl.pt

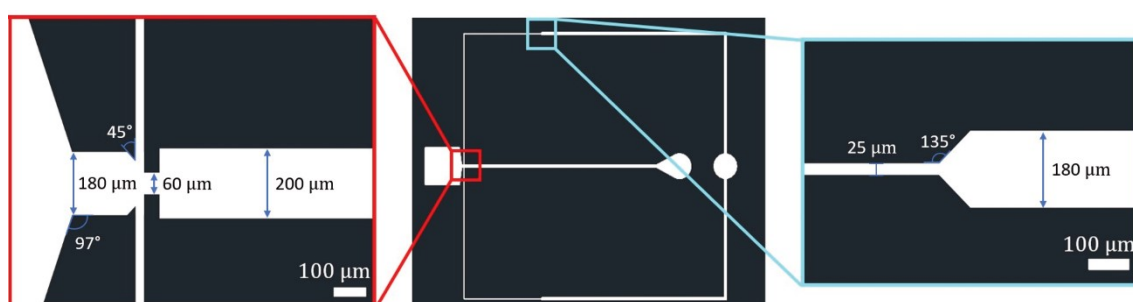

**Supplementary Figure 1.** Droplet generator design layout. Insets: flow-focusing region (left) and oil channel (right).

## Bonsai workflow for droplet analysis

First, users need to download *Bonsai*, freely available at <https://Bonsai-rx.org/docs/articles/installation.html> and install *Bonsai - Starter Pack*, from *Manage Packages* (for more detail please consult <https://Bonsai-rx.org/docs/articles/packages.html>). Moreover, to record from the camera, the user needs to install the adequate camera drivers (e.g., *FlyCapture\_2.11.3.425\_x64.exe* for the camera used in this work) and *Bonsai – PointGrey Library* package. Then, the workflow used during this work is available online <https://github.com/JoanaPNeto/Droplets>. The workflow has three main nodes, which represent different tasks within the droplet pipeline analysis: 1) *'Image Acquisition'*, 2) *'Feature Extraction'* and 3) *'Droplet Analysis'*. *Bonsai* uses the OpenCV vision library (<https://docs.opencv.org/2.4.13.2/>) inside these nodes (e.g., *FromFile*, *FromCamera*, *Crop*, *Grayscale*, *Threshold*, *FindContours*, *OpticalFlow*, *Magnitude*, *Average*, *Centroid*, *Buffer*).

Note: The *'Image Acquisition'* node needs to be defined before starting the workflow. The *'Feature Extraction'* and *'Droplet Analysis'* are nodes with externalized properties, allowing for the dynamic control of several parameters, while the workflow is running. Moreover, by double-clicking the *'Droplet Analysis'* node, the visualization of the data at different stages of processing can be launched at any time in parallel with the execution of the dataflow.

### 1) *'Image acquisition'*

In more detail, the node *'Image acquisition'* enables: i) the visualization and acquisition of real-time video data or ii) the visualization of offline video (i.e., pre-recorded video). Therefore, this workflow can be used online to extract measures and make real-time decisions on the experimental conditions, or to analyse video data offline. If users double-click on the *'Image acquisition'* node, a new workflow panel will open and it is possible to enable or disable the node *'FromFile'* or *'FromCamera'* by right-clicking on the respective node. Please note that users must make sure that the workflow is stopped to select the intended option. If the node *'FromFile'* is enabled (**Supplementary Figure 2A**), it will display a pre-recorded video. On *'Properties'*, clicking on *'FileNameToOpen'* allows users to indicate the video directory (the location where the video is saved on the computer). The video file should be avi format (.avi file extension). If the node *'FromCamera'* is enabled (Supplementary Figure 2B), it will display the video being recorded. To save the video, users must choose a folder in the *'Properties'*, as well as the *'FrameRateToSave'*, and select *'True'* for the option *'SaveVideo'*. The video should be saved in avi format, such as *'MyVideo.avi'*. After, the user can initiate the workflow by clicking *'Start'* and the output of the *'Image Acquisition'* node will appear in the pipeline as *'Frames'*.

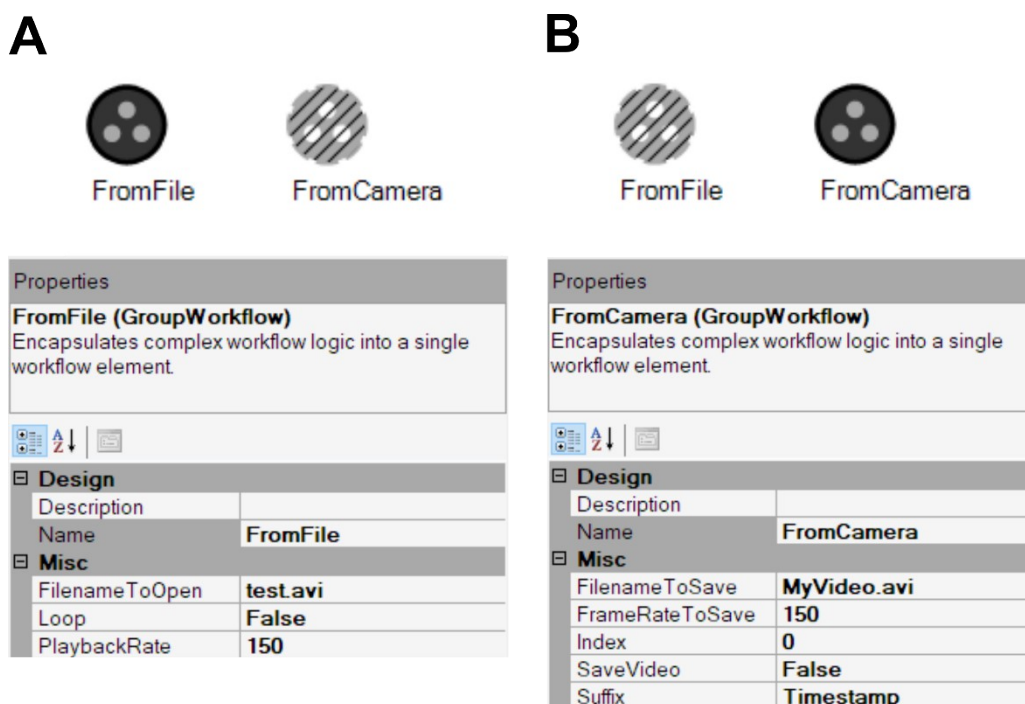

**Supplementary Figure 2.** 'Image Acquisition' group node. (A) 'FromFile' node is enabled, (B) 'FromCamera' node is enabled

## 2) 'Feature extraction'

The node 'Feature extraction' enables the segmentation, detection and extraction of direct measurements related to the droplets. As shown in **Supplementary Figure 3A**, if the user clicks on the node 'Feature extraction', the 'Properties panel' will show three parameters that must be set: i) 'FrameRateToAnalysis', ii) 'RegionOfInterest', and iii) 'Threshold'. First, the correct frame rate of the video analyzed must be selected (i.e., camera/video frame rate). Also, the users need to define a region of interest (ROI) around the microfluidic channel. On the other hand, to understand how this node works, by double-clicking on the node, two important group nodes will appear: the node 'Regionofinterest', which is used to define the ROI, and the 'DropletProcessing' node, which is responsible for the segmentation, detection and direct measurements of droplets. The 'Regionofinterest' crops a rectangular sub-region of each image and converts the image into grayscale, so that a threshold can be applied to create a binary image, depending on the pixel intensity (please see [Video Tutorial: Read, crop and save a video file](#)). Users should select their intended ROI (ideally, the region of interest should include droplets and, if possible, avoid adding walls) by clicking on the first corner of the crop rectangle and dragging down to the last corner of the rectangle. Additionally, inside 'DropletProcessing' (**Supplementary Figure 3B**), the node 'Segmentation' is used to isolate the droplets by using the 'Threshold' value for the binarization of the image: all pixels above the threshold become black, and all pixels below the threshold become white (**Supplementary Figure 3C**). Once more, to visualize what is inside each node, users should make sure that the workflow is stopped, and then double-click on the node. By adjusting the 'Threshold' value on the 'Properties' panel, the border of the droplets may be tuned for the following step of detection.

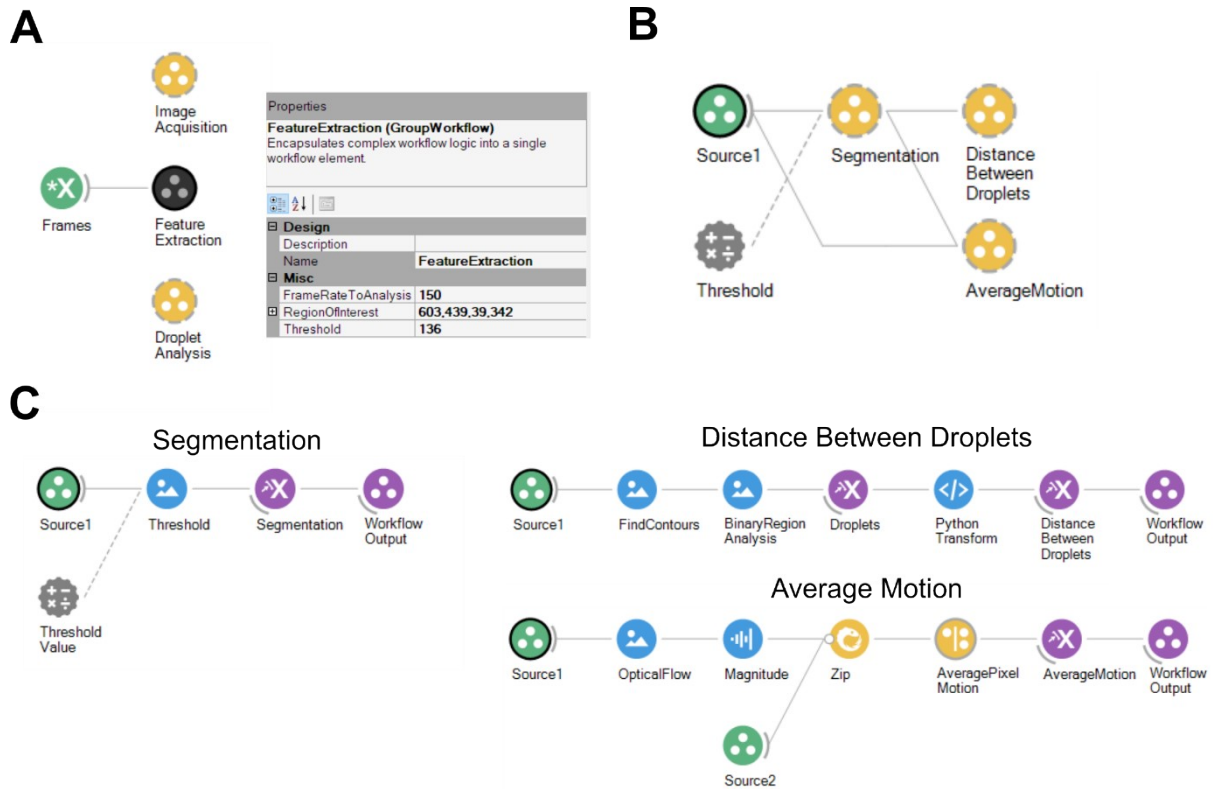

**Supplementary Figure 3.** ‘Feature Extraction’ group node. (A) If the node ‘FeatureExtraction’ is selected, then the ‘Properties’ panel will display all the configuration properties which are available for this node. Most properties can be configured simply by changing the text value in the corresponding row of the property grid, (B) ‘DropletProcessing’ node (that is within the ‘Feature Extraction’ node) where the users can find three group nodes: ‘Segmentation’, ‘DistanceBetweenDroplets’ and ‘AverageMotion’, which unfold as illustrated on (C).

Once the users find appropriate threshold levels for droplets segmentation, droplet detection and droplet measurements can be performed. For the calculation of droplet radius, speed and frequency we will use three measures: i) droplets major axis length, ii) distance between droplets centroid and iii) the average motion of droplets pixels per frame. These values will be computed within the group nodes ‘DistanceBetweenDroplets’ and ‘AverageMotion’ (Supplementary Figure 3B, C). For the droplets major axis length and distance between droplets centroid, firstly the ‘FindContours’ node will trace the contours of all the objects in a black-and-white image. An object is defined as a region of connected white pixels. Then, the operator ‘BinaryRegionAnalysis’ computes image moments to describe droplets after segmentation. Simple properties of the image which are found via image moments include major and minor axis length, area, center of mass, and orientation for all the detected contours per frame<sup>1</sup>. For instance, the major axis (1) and centroid (2) are calculated using imaging raw ( $M00$ ,  $M10$ ,  $M01$ ) and central moments ( $Mu20$ ,  $Mu02$ ,  $Mu11$ ) (please check code here).

$$MajorAxisLength = 2.75 * \sqrt{\left(\frac{Mu20}{M00}\right) + \left(\frac{Mu02}{M00}\right) + \sqrt{\left(2 * \left(\frac{Mu11}{M00}\right) * 2 * \left(\frac{Mu11}{M00}\right) + \left(\left(\frac{Mu20}{M00}\right) - \left(\frac{Mu02}{M00}\right) * \left(\frac{Mu20}{M00}\right) - \left(\frac{Mu02}{M00}\right)\right)\right)}$$

(1)

$$Centroid(x,y) = \left( \frac{M10}{M00}, \frac{M01}{M00} \right) \quad (2)$$

Moreover, the distance in pixels, between the centroid of consecutive droplets is then computed using the *'PythonTransform'* node and saved as *'DistanceBetweenDroplets'*. Basically the code encompasses the calculation of the distance (3) between two points in a 2-dimensional space.

$$Distance = \sqrt{(x_1 - x_2)^2 + (y_1 - y_2)^2} \quad (3)$$

We observed that droplets entering and exiting (Droplet [0] and Droplet [n]) the frame present a 'instable' centroid, so we decided to use the Droplet [1] and [2] in each frame to calculate the distance. Bellow, an example of *'BinaryRegionAnalysis'* output from video 11, where the red dot represents the centroid and the red axis the major axis, and also the code used to calculate the distance between droplet's centroid in position 1 and 2.

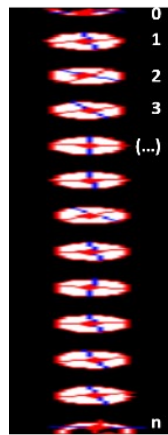

#### #Code used in PythonTransform node

```
from math import sqrt
@returns(float)
def process(value):
    if value.Count < 4:
        return 0
    else:
        d = value[1].Centroid - value[2].Centroid
        return sqrt(d.X * d.X + d.Y * d.Y)
```

Moreover, for the average motion of droplet pixels the *'Opticalflow'* node ([here](#)) computes a dense optical flow through Gunnar Farnerback's algorithm<sup>2</sup> which detects the pixel intensity changes between two consecutive frames. It identifies the motion of objects between every two consecutive frames, providing the flow vectors of all pixels from *'Roilmage'* (represented as *'Source1'*). As shown in **Supplementary Figure 3C** this node is connected to the *'Magnitude'* node, which computes the magnitude (distance covered during pixel motion) from all flow vectors. The vector magnitude is then zipped together with the *'Segmentation'* node (represented as *'Source2'*), which provides the calculation of the motion of all droplet pixels per frame as *'AverageMotion'*. To know more about the *'Zip'* node look [here](#).

### 3) *'Droplet Analysis'*

Finally, the node *'Droplet Analysis'* computes the radius ( $\mu\text{m}$ ), production rate (droplets/s) and speed ( $\mu\text{m/s}$ ) of passing droplets and it is responsible for the visualization and saving of the data. If users click on the node, they will see on *'Properties'* panel the possibility of saving the results in a .csv file (**Supplementary Figure 4A**). To save the file, users need to click on *'FileName'* to choose a folder to save the data and select *'True'* for the option *'SaveData'*. The results (radius, production rate and speed) should be saved in csv format, such as *'results.csv'*. Moreover, users need to define the *'Microns'/ 'Pixels'* aspect ratio by introducing values of

channel width (200  $\mu\text{m}$  in this case) in  $\mu\text{m}$  and its correspondence in pixels. Additionally, it is possible to reduce the susceptibility of the signal to fast changes, particularly in the occurrence of fast vibrations by introducing '*FramesToAverage*'. The larger the number of frames used to calculate the moving average, the more fluctuation/instability smoothing occurs, as more droplets are included in each calculated average. Moreover, by double-clicking on '*Droplet Analysis*', users will find the main nodes employed to calculate radius ( $\mu\text{m}$ ), production rate (droplets/s) and speed ( $\mu\text{m/s}$ ) (**Supplementary Figure 4B**).

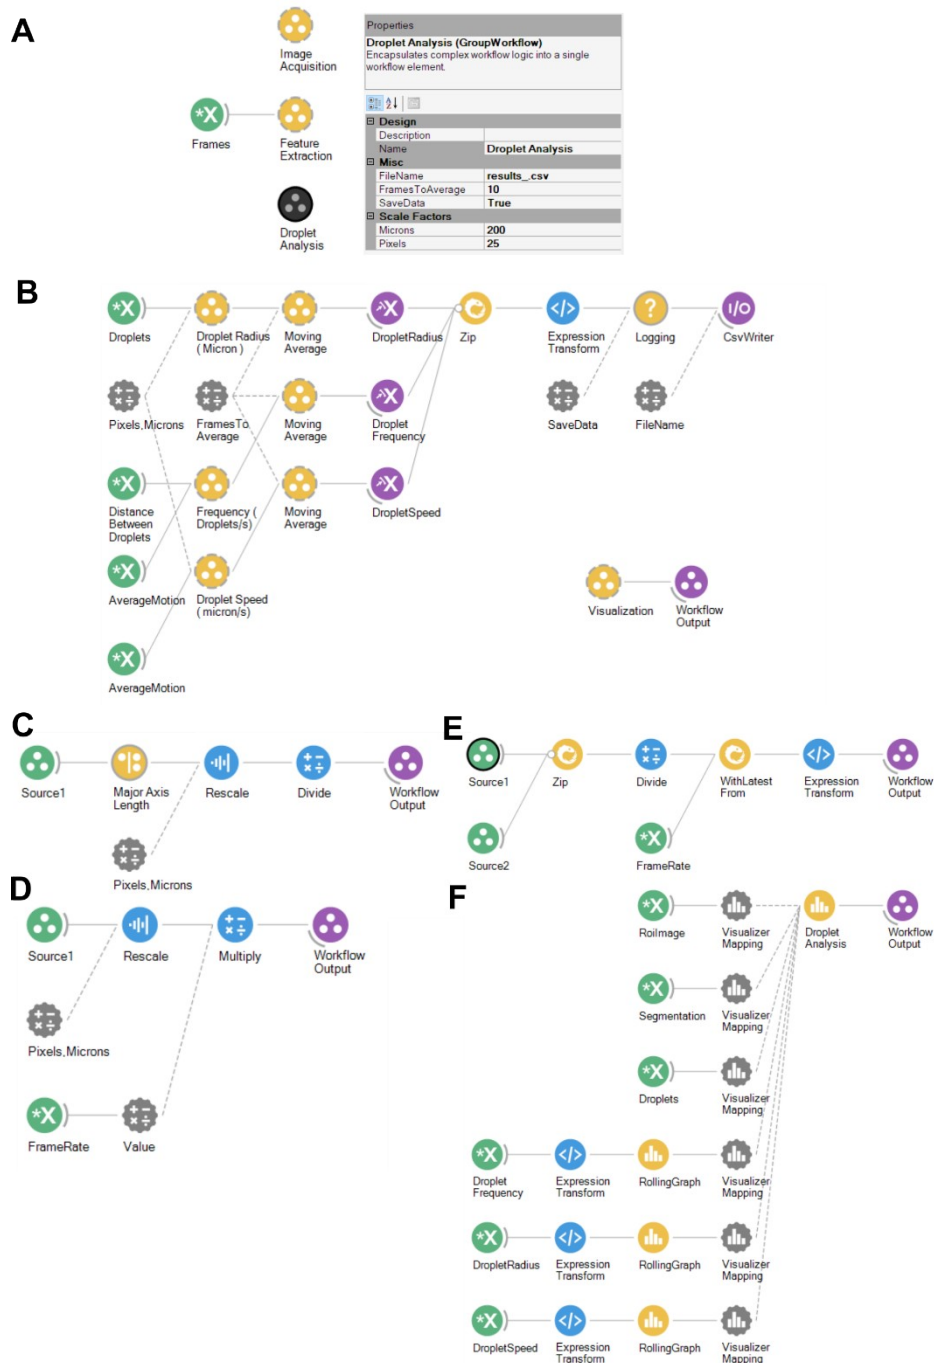

**Supplementary Figure 4.** '*Droplet Analysis*' group node. (A) If the node '*Droplet Analysis*' is selected, the properties panel will display all the configuration properties which are available for this node, which include saving the results in a csv file by enabling '*SaveData*', applying a moving average to data and translating pixels' values to microns. (B) Droplet analysis







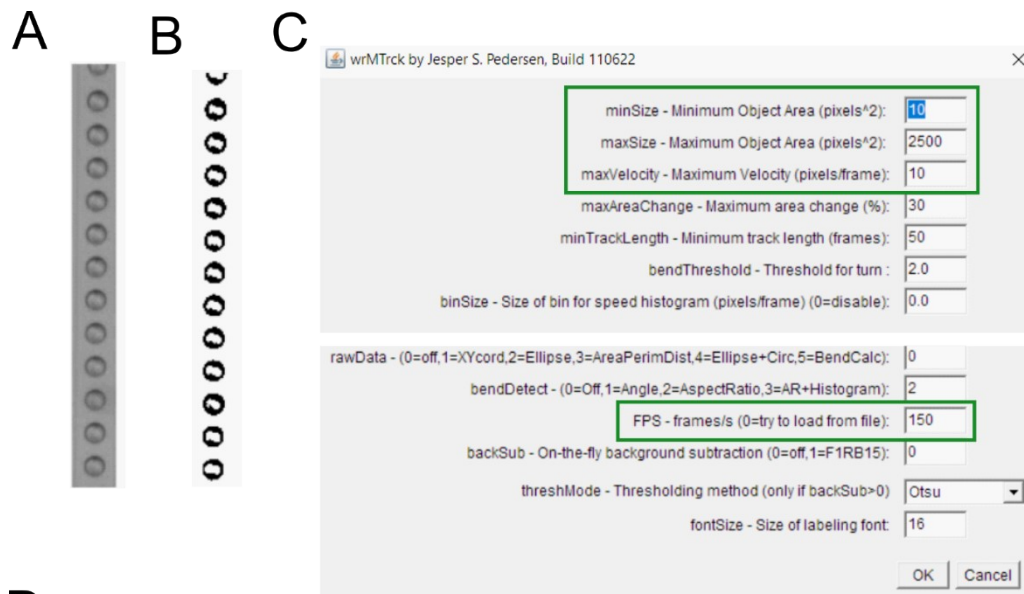

| Track | Length   | Distance | #Frames | 1stFrame | Time(s) | MaxSpeed | Area     | sdArea  | Perim   | sdPerim | avgSpeed |
|-------|----------|----------|---------|----------|---------|----------|----------|---------|---------|---------|----------|
| 1     | 1896.814 | 1896.757 | 50      | 0        | 0.333   | 6133.316 | 6763.520 | 300.031 | 357.180 | 5.967   | 5690.441 |
| 2     | 1981.189 | 1981.108 | 52      | 2        | 0.347   | 6159.880 | 6840.615 | 441.163 | 357.714 | 6.943   | 5714.968 |
| 3     | 1979.499 | 1979.437 | 52      | 6        | 0.347   | 6241.604 | 6818.461 | 402.675 | 358.022 | 6.570   | 5710.094 |
| 4     | 1981.323 | 1981.283 | 52      | 10       | 0.347   | 6105.163 | 6814.769 | 394.011 | 357.655 | 6.879   | 5715.356 |
| 5     | 1982.099 | 1982.048 | 52      | 15       | 0.347   | 6316.415 | 6817.231 | 425.188 | 357.820 | 5.932   | 5717.595 |
| 6     | 1982.108 | 1982.053 | 52      | 19       | 0.347   | 6185.686 | 6845.539 | 404.565 | 358.951 | 5.517   | 5717.618 |
| 7     | 1940.297 | 1940.251 | 51      | 24       | 0.340   | 6078.363 | 6816.627 | 373.482 | 357.538 | 6.343   | 5706.757 |

**Supplementary Figure 5.** Image J software for droplet speed analysis where the wrMTrck plugin was used to obtain the average droplet speed for each video. The video was imported, the crop was adjusted and all frames converted into binary images. Then, the plugin was started and the maximum and minimum size of droplets to detect were adjusted, as well as the maximum expected speed. (A) Video crop section, (B) Binary image after applying 'Make Binary' command, (C) Parameters configuration for droplet speed calculation. Green boxes indicate the parameters to adjust, (D) Summary of results in  $\mu\text{m}$  with speed highlighted with a green box.

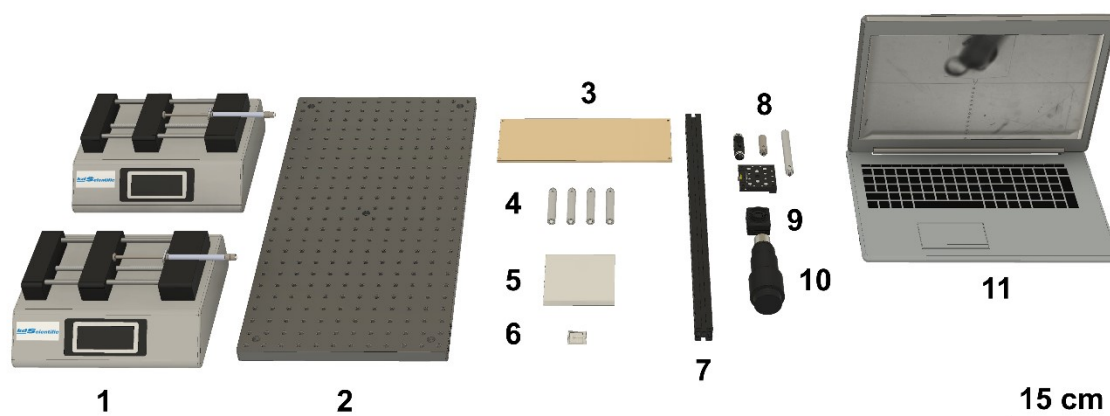

**Supplementary Figure 6.** Visualization of all the components required for the generation and visualization of nano-liter droplets, disassembled. The following components are numbered: 1 – two Legato 210 P syringe pumps from KdScientific (Holliston, MA, USA); 2 - MBH3060/M aluminum optical breadboard from ThorLabs (Newton, NJ, USA); 3 – standard acrylic base, cut and drilled with laser (dyed in amber in this image for better visualization); 4 – four optical posts (model TR75V/M from ThorLabs); 5 – custom-made LED lighting base; 6 – microfluidic device; 7 – construction rail (model XE25L500/M from ThorLabs); 8 – camera mounting adaptors and screws (several models, from ThorLabs); 9 - Chameleon3 USB3 monochrome camera (model CM3-U3-13Y3M-CS, Python 1300 from Teledyne FLIR, Wilsonville, OR, USA); 10 - MLM3X-MP magnification lens from Computar (Cary, NC, USA); 11 – Laptop for image analysis with the Bonsai software. Briefly, the syringe pumps push the oil and aqueous phases onto the microfluidic chip, and droplets are produced at the flow focusing region. The microfluidic device, in turn, is positioned on top of the transparent acrylic base, and the LED lights below are adjusted to improve the contrast of the droplet border, which in turn facilitates droplet segmentation and analysis by Bonsai. All adjustments are observed via the computer, which receives real-time input from the camera (connected to the magnifying lens) positioned directly above the microfluidic chip.

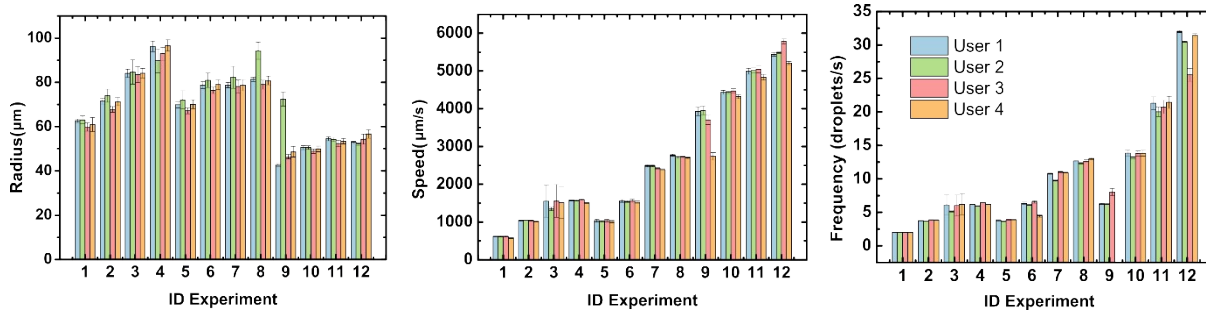

**Supplementary Figure 7.** Quantification of droplet radius, speed and droplet generation rate by different users using Bonsai.

| ID Experiment | Flow ( $\mu\text{L}/\text{min}$ ) |       | Image J                  |         |                                  |        |                   |      | Bonsai                   |         |                                  |        |                   |      | Total |
|---------------|-----------------------------------|-------|--------------------------|---------|----------------------------------|--------|-------------------|------|--------------------------|---------|----------------------------------|--------|-------------------|------|-------|
|               | Oil                               | Water | Radius ( $\mu\text{m}$ ) | stdv    | Speed ( $\mu\text{m}/\text{s}$ ) | stdv   | Freq (droplets/s) | stdv | Radius ( $\mu\text{m}$ ) | stdv    | Speed ( $\mu\text{m}/\text{s}$ ) | stdv   | Freq (droplets/s) | stdv |       |
| 1             | 1.25                              | 0.25  | 64.7005                  | 3.50666 | 614.10                           | 10.55  | 2.07              | 0.04 | 62.63948                 | 0.8175  | 617.49                           | 14.20  | 1.99              | 0.02 | 32    |
| 2             | 1.25                              | 0.5   | 69.85876                 | 3.71288 | 1032.09                          | 10.08  | 4.00              | 0.05 | 71.53448                 | 1.37094 | 1039.52                          | 11.68  | 3.76              | 0.03 | 75    |
| 3             | 1.25                              | 1     | 82.0245                  | 2.25788 | 1536.19                          | 365.37 | 6.34              | 1.80 | 84.07315                 | 1.84121 | 1551.44                          | 422.66 | 6.12              | 1.55 | 129   |
| 4             | 1.25                              | 1.5   | 93.59667                 | 7.26481 | 1604.70                          | 15.52  | 6.81              | 0.39 | 96.26795                 | 2.3841  | 1577.89                          | 15.71  | 6.22              | 0.05 | 93    |
| 5             | 2.5                               | 0.5   | 69.61021                 | 4.7483  | 1053.80                          | 33.94  | 4.09              | 0.12 | 69.87327                 | 1.49203 | 1036.08                          | 35.36  | 3.79              | 0.09 | 76    |
| 6             | 2.5                               | 1     | 76.57924                 | 4.62034 | 1598.65                          | 42.99  | 6.99              | 0.26 | 78.8214                  | 1.61302 | 1557.83                          | 40.23  | 6.35              | 0.18 | 83    |
| 7             | 2.5                               | 1.5   | 78.754                   | 6.16459 | 2401.04                          | 11.21  | 11.63             | 0.29 | 78.72582                 | 1.18537 | 2490.49                          | 22.89  | 10.77             | 0.09 | 129   |
| 8             | 2.5                               | 2     | 80.44718                 | 3.58136 | 2825.46                          | 14.34  | 14.42             | 1.54 | 81.40987                 | 0.96005 | 2770.36                          | 27.70  | 12.67             | 0.14 | 177   |
| 9             | 5                                 | 0.5   | 43.75581                 | 3.7774  | 4115.82                          | 140.61 | 6.56              | 0.16 | 42.65912                 | 0.65059 | 3928.17                          | 110.19 | 6.26              | 0.08 | 81    |
| 10            | 5                                 | 1     | 49.3108                  | 3.02261 | 4515.95                          | 44.10  | 14.45             | 0.67 | 50.53434                 | 0.89209 | 4433.86                          | 52.87  | 13.86             | 0.43 | 222   |
| 11            | 5                                 | 1.5   | 55.59898                 | 3.20432 | 5108.04                          | 119.41 | 21.88             | 1.75 | 54.53234                 | 0.89814 | 4992.67                          | 76.56  | 21.31             | 0.94 | 426   |
| 12            | 5                                 | 2     | 54.36598                 | 2.86684 | 5836.80                          | 82.64  | 37.95             | 4.37 | 52.93843                 | 0.54075 | 5438.83                          | 50.80  | 32.01             | 0.15 | 576   |

**Supplementary Table 1.** Quantification of radius, speed and generation rate (as frequency) using Bonsai and their comparison with Image J quantification. The movie ID and the flow rates for each experiment are presented. The average droplet radius, speed and frequency values are calculated with standard deviation (stdv) for each video. With the Bonsai workflow, we measured for the respective flow rates ( $\mu\text{L}/\text{min}$ ) a certain number of droplets (total).

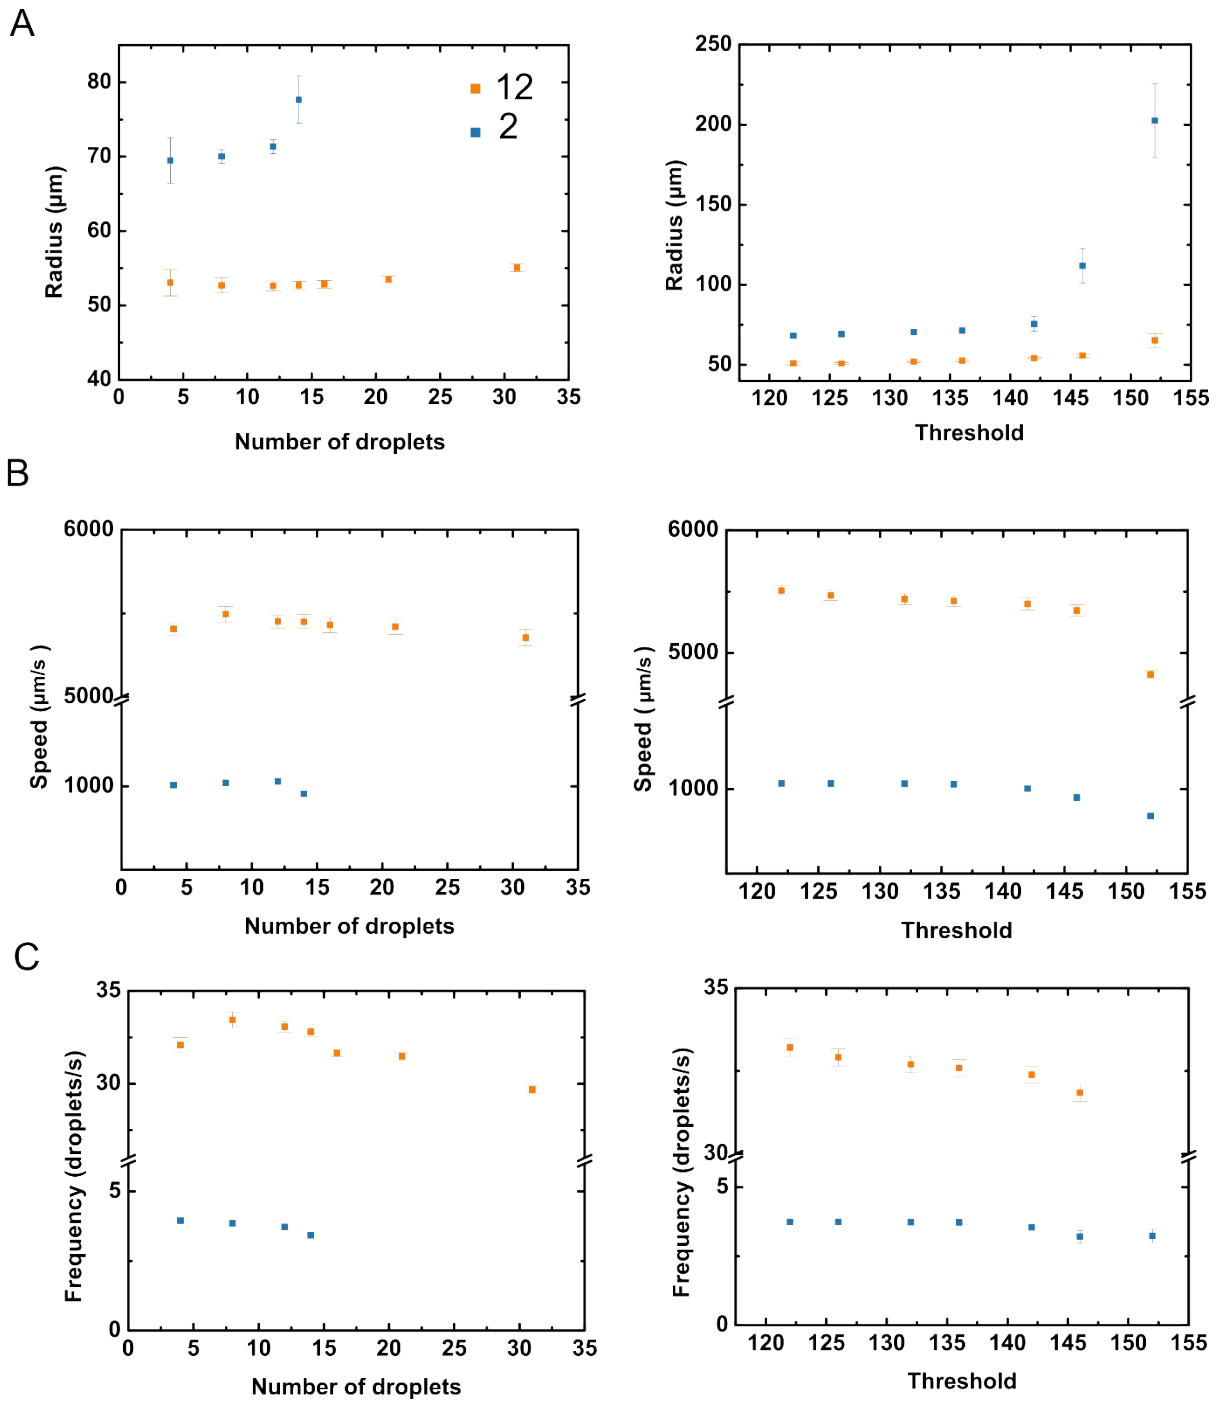

**Supplementary Figure 8.** Influence of number of droplets (i.e., ROI) and threshold value on *Bonsai* outputs. (A) Droplet radius, (B) speed and (C) generation rate for experiments 2 and 12. For the evaluation of number of droplets, the threshold was set at 136 and for the quantification of threshold, the ROI was defined with  $\approx 12$  droplets.

A Number of Droplets: 12

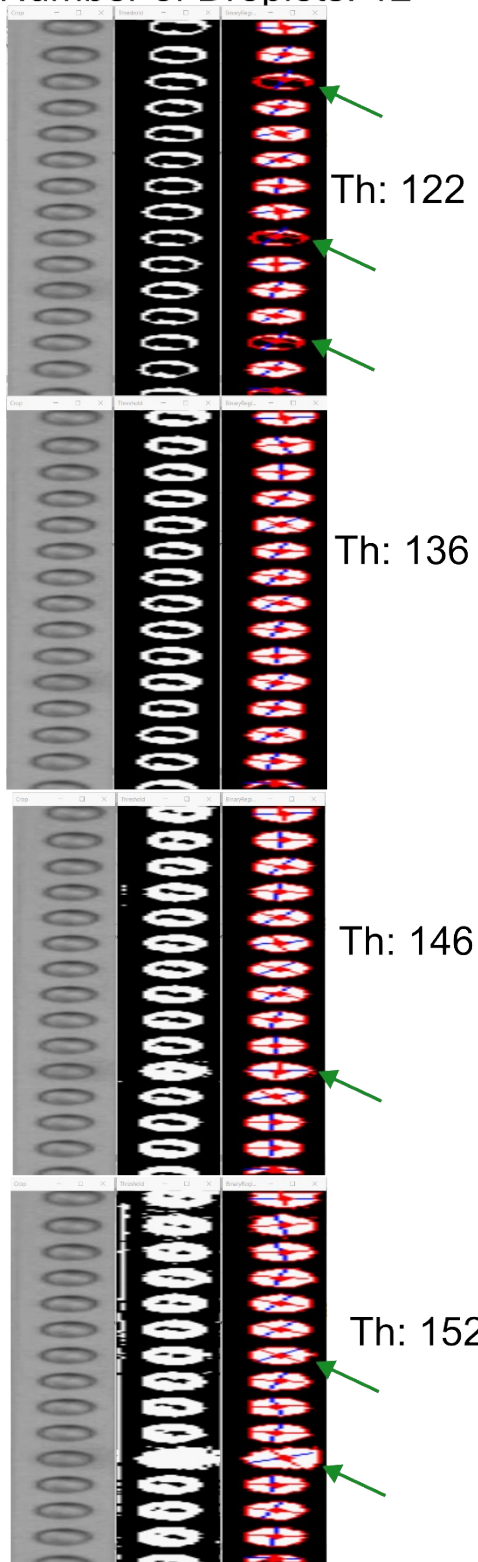

B Number of Droplets: 14

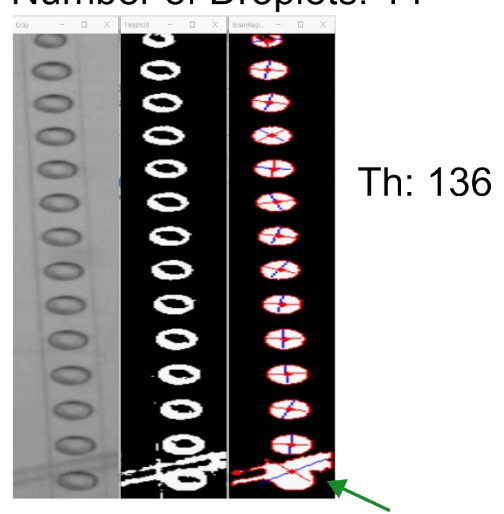

Number of Droplets: 21

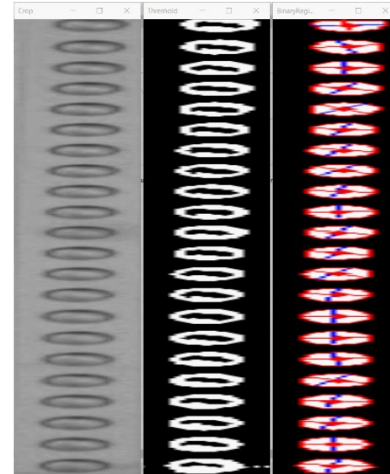

**Supplementary Figure 9.** Visualization of 'Crop', 'Threshold' and 'BinaryRegionAnalysis' outputs for a range of droplet numbers and threshold values. (A) Different threshold (Th) values with a fixed droplet number of 12, (B) The optimized threshold value for a high number of droplets (14 droplets for experiment 2 and 21 droplets for experiment 12). Green arrows identify artifacts.

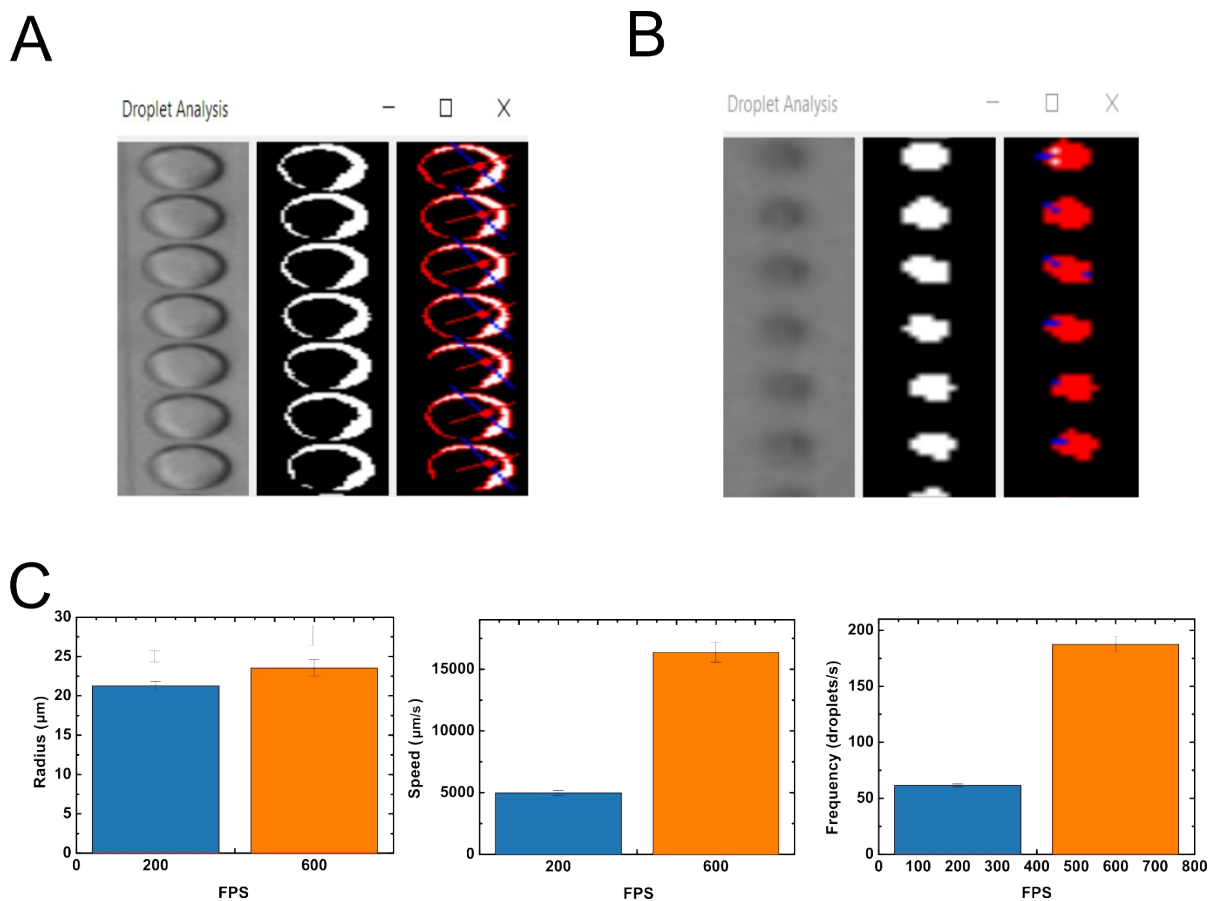

**Supplementary Figure 10.** Challenging experiments for droplet analysis using Bonsai. (A) Experiment where droplets are close to each other (oil and water flow of 5 and 4  $\mu\text{l}/\text{min}$ , respectively). Droplets with (B) small radius approximately 20  $\mu\text{m}$  and (C) with high generation rate  $\approx 200$  droplets/s (oil and water flow of 20 and 4  $\mu\text{l}/\text{min}$ , respectively). The blue bars correspond to a video where the camera frame rate was set to  $\approx 200$  fps and the orange bars correspond to a video where the camera frame rate was set to  $\approx 600$  fps.

| Reference | Detection Method          | Label-Free | Difficulty to implement and use | Cost   | Processing Speed | Comments                                                                                                           |
|-----------|---------------------------|------------|---------------------------------|--------|------------------|--------------------------------------------------------------------------------------------------------------------|
| 3-4       | Optical-Fluorescence      | No         | Medium                          | High   | Medium           | Need of fluorescent dye, expensive                                                                                 |
| 5-8       | Electrical                | Yes        | High                            | Medium | High             | Complex, difficult to implement and expensive                                                                      |
| 9-12      | Optical-Brightfield image | Yes        | Low                             | Low    | Medium           | Limited processing speed (250 Hz)                                                                                  |
| 13        | Optical-Brightfield image | Yes        | Low                             | High   | High             | Expensive                                                                                                          |
| Our work  | Optical-Brightfield image | Yes        | Low                             | Low    | High             | Low cost, easy to use, fast image processing and analysis ( $\approx 7$ ms @ 150 fps and $\approx 2$ ms @ 611 fps) |

**Supplementary Table 2.** Summary of existing methods and tools found in literature for real-time and automated droplet analysis.



1. Gonzalez, R. C. & Woods, R. E. *Digital Image Processing*. (Pearson, 2018).
2. Farnebäck, G. Two-frame motion estimation based on polynomial expansion. *Lect. Notes Comput. Sci. (including Subser. Lect. Notes Artif. Intell. Lect. Notes Bioinformatics)* **2749**, 363–370 (2003).
